# Supplementary material for: Robotische Hernienchirurgie II
Source: Springer Nature journal article supplement (doi:10.1007/s00104-021-01450-5), 2021-07-13
Supplement: MOESM4 [file 19356648]

Patientenaufkleber

Datum: \_\_\_\_ / \_\_\_\_ / \_\_\_\_

Operateur: \_\_\_\_\_

### r-ventrale TAPP r-Rives (TARUP)

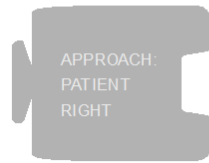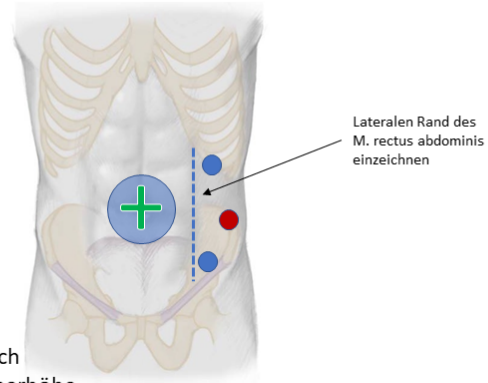

Rechter Arm ausgelagert  
Körper Linksbündig zum Tisch  
Linker Arm leicht unter Körperhöhe

daVinci Anatomie:  
• Abdomen unten

daVinci Position:  
• Patient rechts

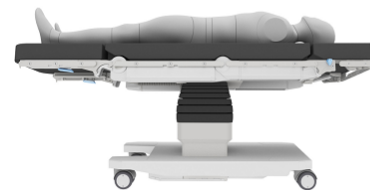

## Perioperative Prozeduren/daVinci-Checkliste (Achtung: Ersetzt nicht das WHO Team-Time-Out)

Ich habe den Aufklärungsbogen heute gesichtet und auf Inhalt und Bemerkungen hin kontrolliert:  Ja  Nein

Perioperative Antibiose:  Ja  Cefuroxim 1,5g (Gewichtsadaptiert) (Alternativ:  Clindamycin 600mg)

Hybrid-Verfahren:  Ja  Nein Wenn ja, Ansage an OTA's machen.

**Vor Andocken:** Abstand Trokar-Linie zur Linea alba > 15cm; Rektusränder eingezeichnet:  Ja  Nein

Es handelt sich um eine Inzisionalhernie oder um ein Rezidiv:  Ja  Nein

**Bei Rezidiv, LA/LÄ vor Beginn der Operation informiert:**  Ja  Nein

Anzahl der Voroperationen bzw. Adhäsionsvorgeschichte bekannt:  Ja  Nein

Ropivacain-Infiltration der Portinzisionen vor dem Schnitt erfolgt:  Ja  Nein

Laparoskopische Sichtkontrolle der Trokareinstichstellen:  Ja  Nein

**Konsole:** Komplette Adhäsiolelyse der vorderen Bauchdecke erfolgt:  Ja  Nein

r-Rives (Synonym: r-TARUP):

Einstieg in ipsilaterale Rektusscheide, weit lateral:  Ja  Nein

**Cave:** Crossover am medialen Rand der Rektusscheide: erneute Inzision der posterioren Scheide, die Linea alba bleibt dabei intakt.

**Cave:** Instabilität der Linea alba durch ungewollte Eröffnung der vorderen Rektusscheide.

**Cave:** Verletzung der sehr dünnen Nabelhaut.

Mobilisation allen Fetttes aus Nabel-Pforte und epigastrischen Lücken:  Ja  Nein

Ausschluss weiterer Hernien bis zum Xiphoid:  Ja  Nein

Präparation im Retzius- und Bogros-Raum:  Ja  Nein

Nabelhaut mit Vicryl reinseriert:  Ja  Nein

Transversale V-Loc-Naht der umbilikalen Bruchlücke:  Ja  Nein

Netz-Messung in cm; 6-fache-Fixation (lockere Vicryl-Nähte):  Ja  Nein

Fortlaufende Naht der hinteren Rektusscheide (V-Loc 3-0):  Ja  Nein

r-ventrale TAPP:

Wie r-Rives, Zugang allerdings nur durch Inzision des Peritoneums:  Ja  Nein

Akzidentelle Einrisse des Peritoneums wurden vernäht:  Ja  Nein

**Alternative: Vicryl-Netz-Interposition bei grossen Peritonealdefekten:**  Ja  Nein

|                                                                  |                             |                               |
|------------------------------------------------------------------|-----------------------------|-------------------------------|
| <b>Abschluss:</b> Hybrid-Hautresektion überschüssiger Nabelhaut: | <input type="checkbox"/> Ja | <input type="checkbox"/> Nein |
| Wenn 12mm Port: Fasziennaht mit Endoclose unter Sicht erfolgt:   | <input type="checkbox"/> Ja | <input type="checkbox"/> Nein |
| Port-Entfernung unter Sichtkontrolle auf Nachblutung:            | <input type="checkbox"/> Ja | <input type="checkbox"/> Nein |
| Normale postoperative Verordnung:                                | <input type="checkbox"/> Ja | <input type="checkbox"/> Nein |

**Prästationäre Vorbereitung:**  
 Ggf. CT-Abdomen mit transversalen und Sagittalen Schnitten (Morphologie und Verwachsungen)  
 Würzburg-Inzisionalhernienklassifikation  
 Wenn Bruchlücke mehr als 8cm breit, r-TAR oder r-IPOM erwägen.

**Nahtmaterial und Aushilfsmaterialien:**  
 V-Loc 180 (grün) 3-0 USP V-20 (15cm)  
 Vicryl 3-0 SH (20cm)  
 Vicryl 3-0 ohne Nadel Für Netz-Einrollung Lineal  
 DynaMesh Endolap Visible 15x10cm Netz (Ggf.: Vicryl-Netz 28x18cm)  
 (Ggf. Progrid Netz 30x15cm)  
 Markierstift

**Lagerung:**  
 Rückenlage  
 Keine Pink-Pad  
 Rechter Arm wird ausgelagert  
 Patient liegt linksbündig am OP-Tisch  
 Linker Arm leicht unter Körperhöhe

**Geplante OP-Zeit:** 1-3h

**Instrumente:**  
 30° Optik  
 Prograsp Forceps  
 Mega SutureCut Needle Driver  
 Hot Shears MCS  
 3x 8mm daVinci Trokare  
 (Ggf. 1x 12mm daVinci Trokar)

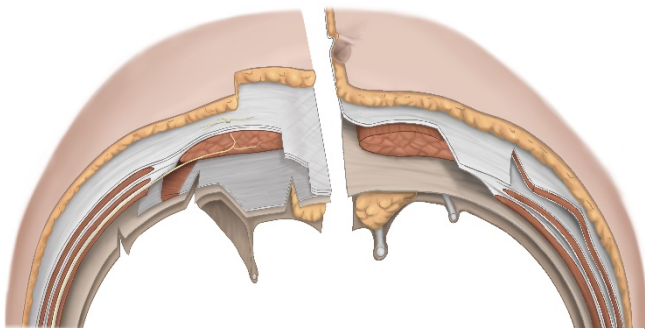

Supraumbilikale Schichten      Infraumbilikale Schichten

Aus: Dietz, Fortely, Beldi, Wiegering (Hrsg.) Offene Hernienchirurgie (2012) Springer Verlag

**Hautnaht:**  
 Ropivacain 0,5% 10ml  
 Caprosyn 4-0 USP mit P-24 Nadel  
 Glubran-Verband

**Postoperative Verordnung:**  
 Mobilisation am Folgetag  
 Vollbelastung nach 3-14 Tagen

**CIRS-Meldung:**  Ja     Nein

**Swiss DRG** G09D, Zielverweildauer: 0 | 3 | 9 Tage

Geplante Entlassung: \_\_\_\_ / \_\_\_\_ / \_\_\_\_

| Ocurrence     | M = morphology  | S = size (cm) | RF = risk factors (+ -> +++) |
|---------------|-----------------|---------------|------------------------------|
| p (primary)   | m (median)      | a x b         | Obesity (BMI >25)            |
| r (recurrent) | u (umbilical)   |               | Male gender                  |
|               | sp (suprapubic) |               | Nicotine abuse               |
|               | sc (subcostal)  |               | Wound contamination          |
|               | t (transversal) |               | Age > 45 years               |
|               | l (lumbal)      |               | Disease                      |
|               | pm (paramedian) |               | 2nd laparot. < 1 month       |
|               | nc (other)      |               | Emergency procedure          |
|               |                 |               | Postop. Complications        |
|               |                 |               | ...                          |

v/i M... S...x... RF...

**Debriefing: Was kann bei der nächsten OP besser gemacht werden?**
